# Supplementary material
Source: publisher figshare collection journal article supplement (https://acs.figshare.com/ndownloader/files/13304219)
Supplement: Supplementary file 1 [file 13304219]

# Supporting Information For

## The Effects of Deuteration of $^{13}\text{C}$ -enriched Phospholactate On the Efficiency of Parahydrogen-Induced Polarization By Magnetic Field Cycling

Oleg G. Salnikov,<sup>a,b,#</sup> Roman V. Shchepin,<sup>c,d,#</sup> Nikita V. Chukanov,<sup>a,b,#</sup> Lamya Jaigirdar,<sup>c,e</sup> Wellington Pham,<sup>c,d,f,g</sup> Kirill V. Kovtunov,<sup>a,b</sup> Igor V. Koptiyug,<sup>a,b</sup> and Eduard Y. Chekmenev<sup>c,d,f,g,h,i,\*</sup>

<sup>a</sup>International Tomography Center SB RAS, 3A Institutskaya St., Novosibirsk 630090, Russia

<sup>b</sup>Novosibirsk State University, 2 Pirogova St., Novosibirsk, 630090, Russia

<sup>c</sup>Vanderbilt University Institute of Imaging Science (VUIIS), <sup>d</sup> Department of Radiology, <sup>e</sup>School of Engineering, <sup>f</sup>Department of Biomedical Engineering, and <sup>g</sup>Vanderbilt-Ingram Cancer Center (VICC), Vanderbilt University, Nashville, Tennessee 37232-2310, United States

<sup>h</sup>Department of Chemistry, Integrative Biosciences (Ibio), Wayne State University, Karmanos Cancer Institute (KCI), Detroit, Michigan, 48202, United States

<sup>i</sup>Russian Academy of Sciences, Leninskiy Prospekt 14, Moscow, 119991, Russia

# Table of Contents

|                                                                                              |    |
|----------------------------------------------------------------------------------------------|----|
| 1. Characterization of potassium 1- <sup>13</sup> C-phosphoenolpyruvate .....                | S3 |
| 2. Characterization of potassium 1- <sup>13</sup> C-phosphoenolpyruvate-d <sub>2</sub> ..... | S5 |
| 3. Additional data.....                                                                      | S9 |

## 1. Characterization of potassium 1-<sup>13</sup>C-phosphoenolpyruvate

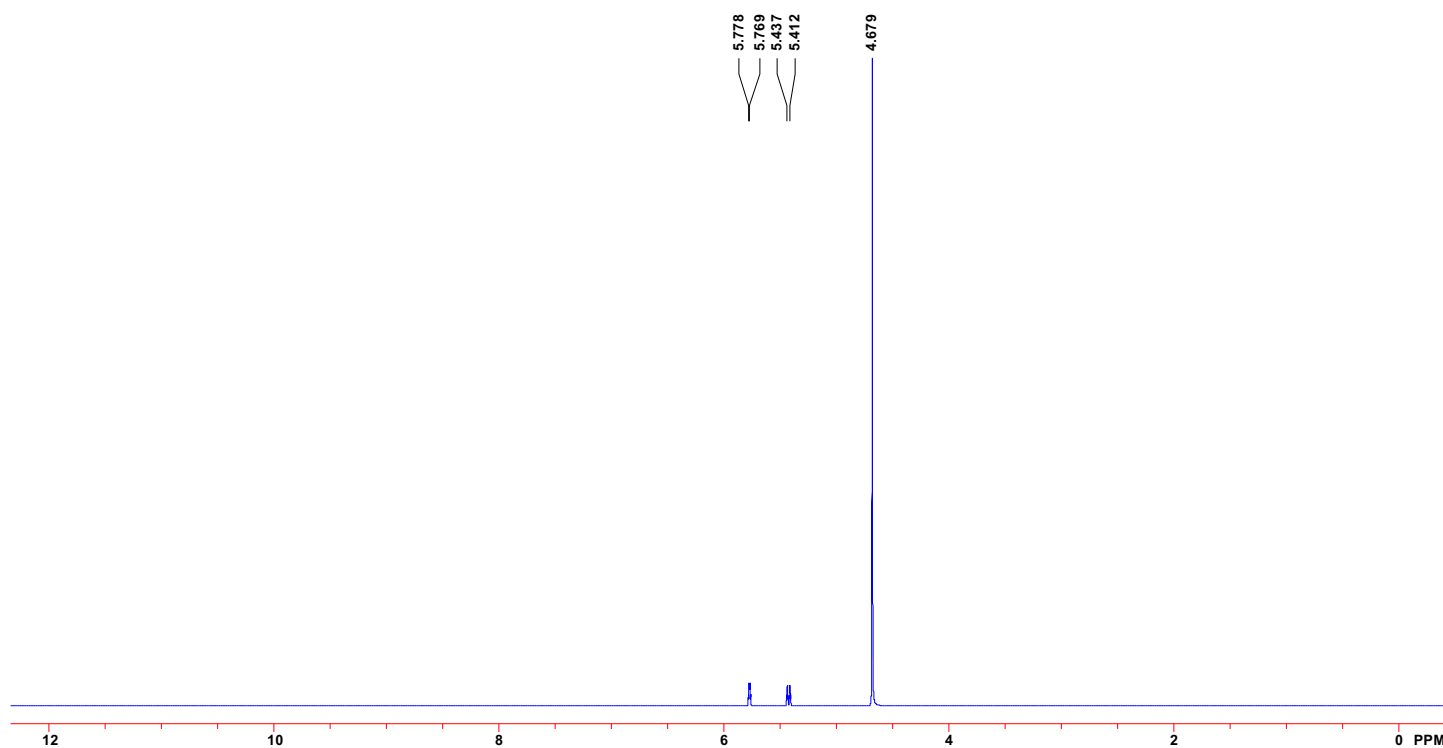

**Figure S1.** <sup>1</sup>H NMR spectrum of potassium 1-<sup>13</sup>C-phosphoenolpyruvate in D<sub>2</sub>O. Note two NMR multiplets at ~5.8 ppm and ~5.4 ppm corresponding to two protons of 1-<sup>13</sup>C-phosphoenolpyruvate. The resonance at 4.7 ppm is the residual proton signal of D<sub>2</sub>O.

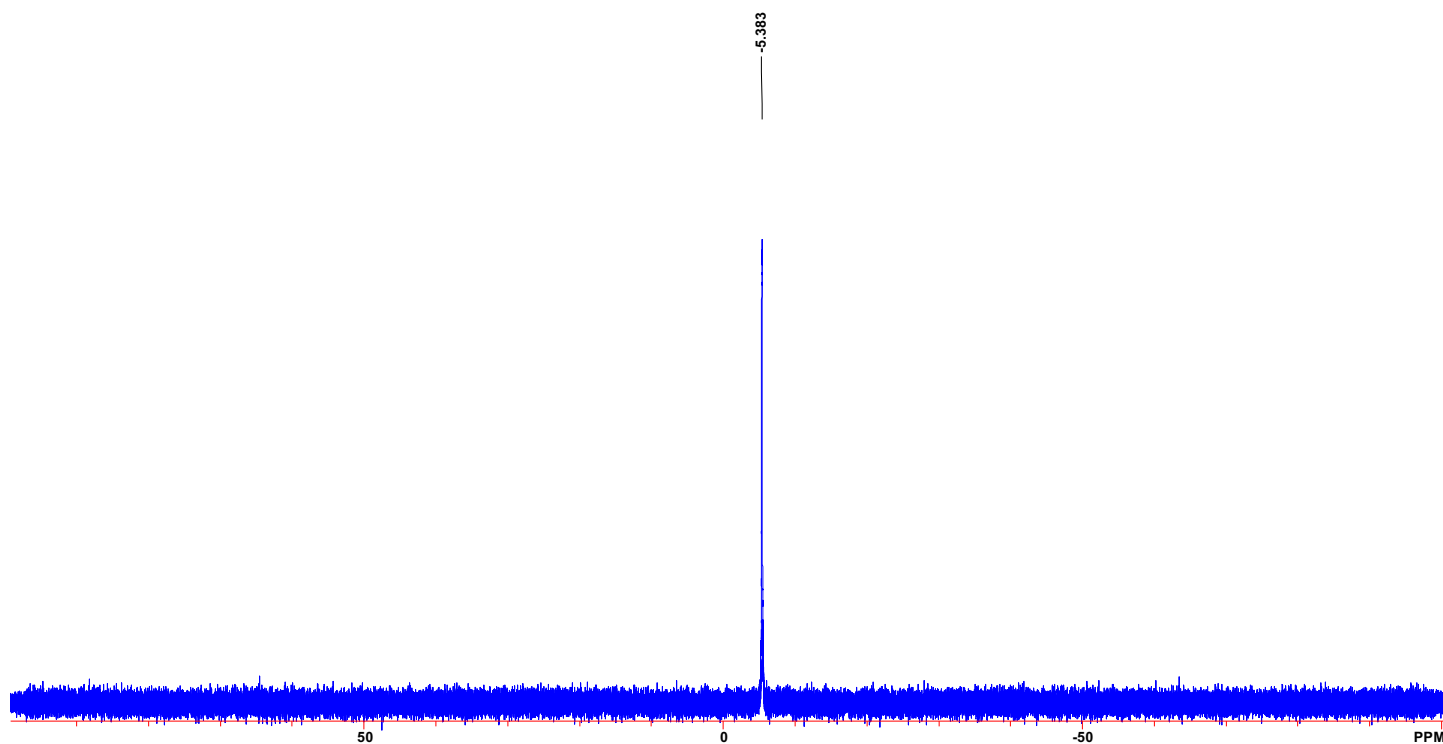

**Figure S2.**  $^{31}\text{P}$  NMR spectrum of potassium 1- $^{13}\text{C}$ -phosphoenolpyruvate in  $\text{D}_2\text{O}$ .

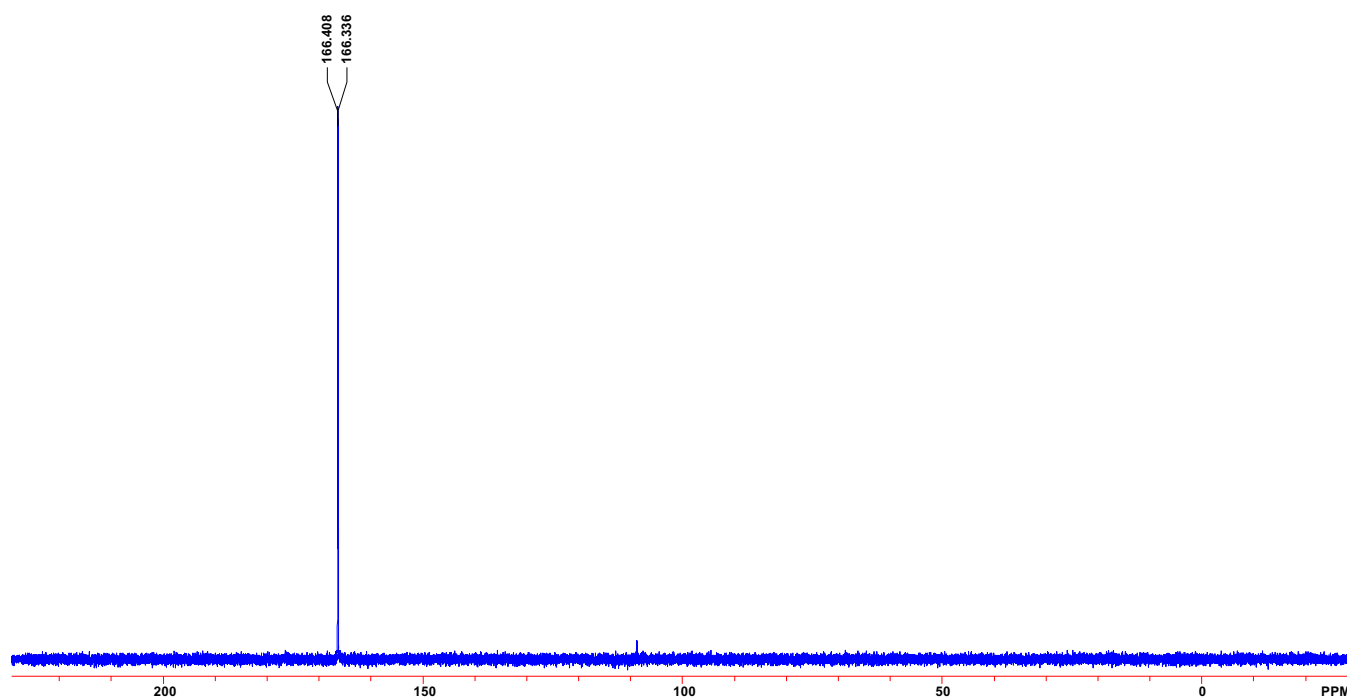

**Figure S3.**  $^{13}\text{C}$  NMR spectrum of potassium 1- $^{13}\text{C}$ -phosphoenolpyruvate in  $\text{D}_2\text{O}$ .

## 2. Characterization of potassium 1-<sup>13</sup>C-phosphoenolpyruvate-d<sub>2</sub>

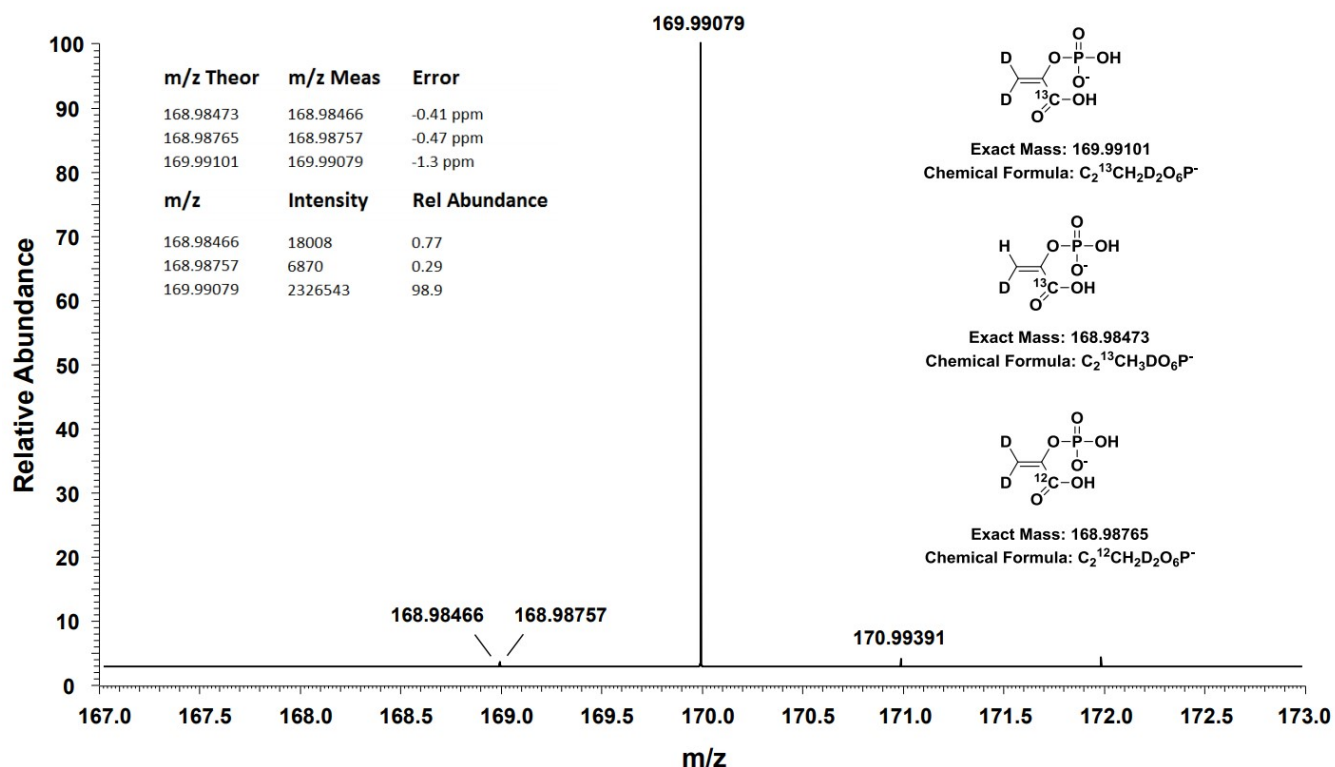

**Figure S4.** HR-MS negative ion spectrum of 1-<sup>13</sup>C-phosphoenolpyruvate-d<sub>2</sub>. High resolution mass spectrometry was performed by direct liquid infusion using an Orbitrap mass spectrometer (Thermo-Finnigan, San Jose, CA) equipped an Ion-Max source housing and a standard electrospray (ESI) ionization probe in negative ion mode at a resolving power of 60,000 (at m/z 400). Calculated for <sup>12</sup>C<sub>2</sub><sup>13</sup>C<sub>1</sub>H<sub>2</sub>D<sub>2</sub>O<sub>6</sub>P<sup>-</sup> (M-H<sup>-</sup>): 169.99101; found 169.99079 (-1.3 ppm).

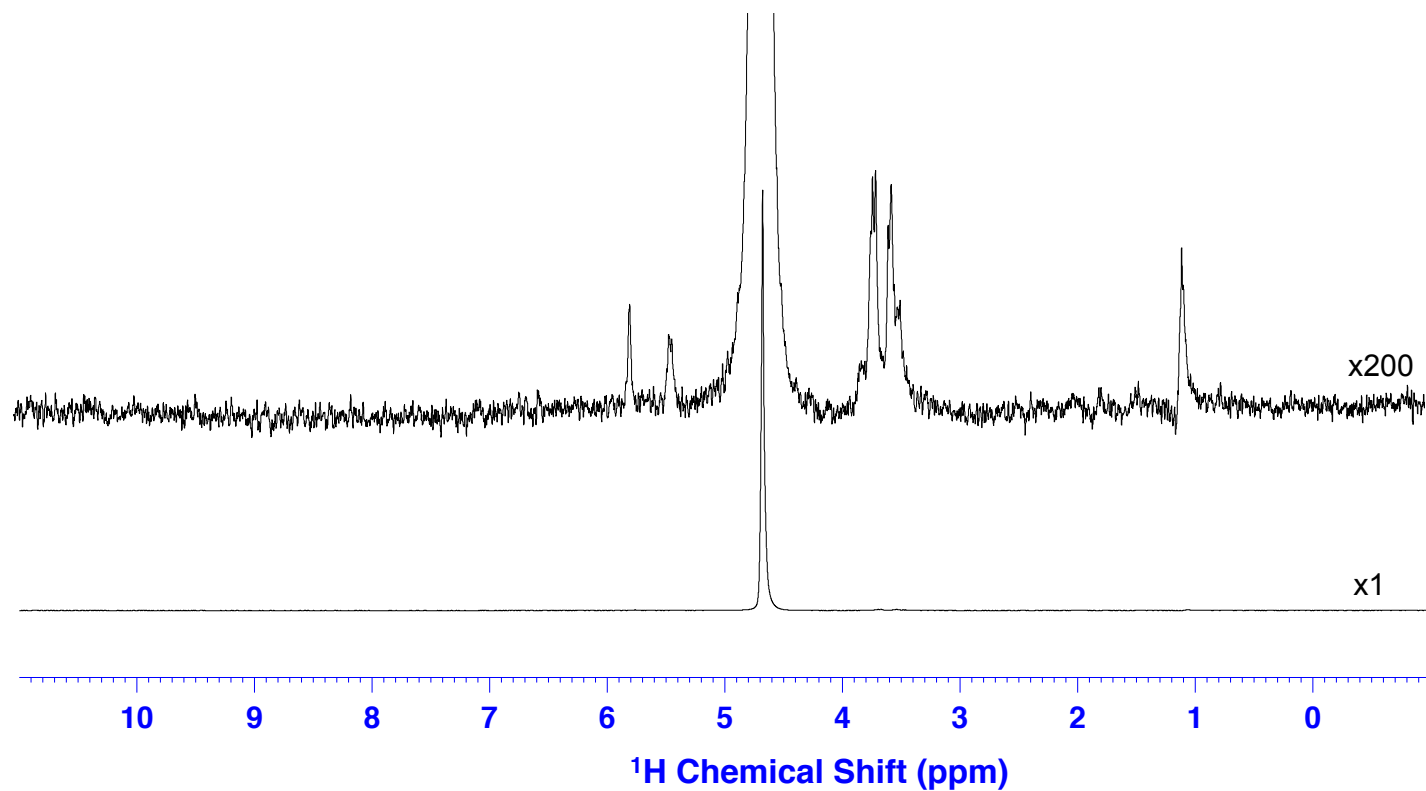

**Figure S5.**  $^1\text{H}$  NMR spectrum of potassium 1- $^{13}\text{C}$ -phosphoenolpyruvate- $\text{d}_2$  in  $\text{D}_2\text{O}$ . Note two NMR multiplets at  $\sim 5.8$  ppm and  $\sim 5.4$  ppm (corresponding to two protons of 1- $^{13}\text{C}$ -phosphoenolpyruvate) have significantly reduced intensity compared to those seen in Figure S1. The resonance at 4.7 ppm is the residual proton signal of  $\text{D}_2\text{O}$ .

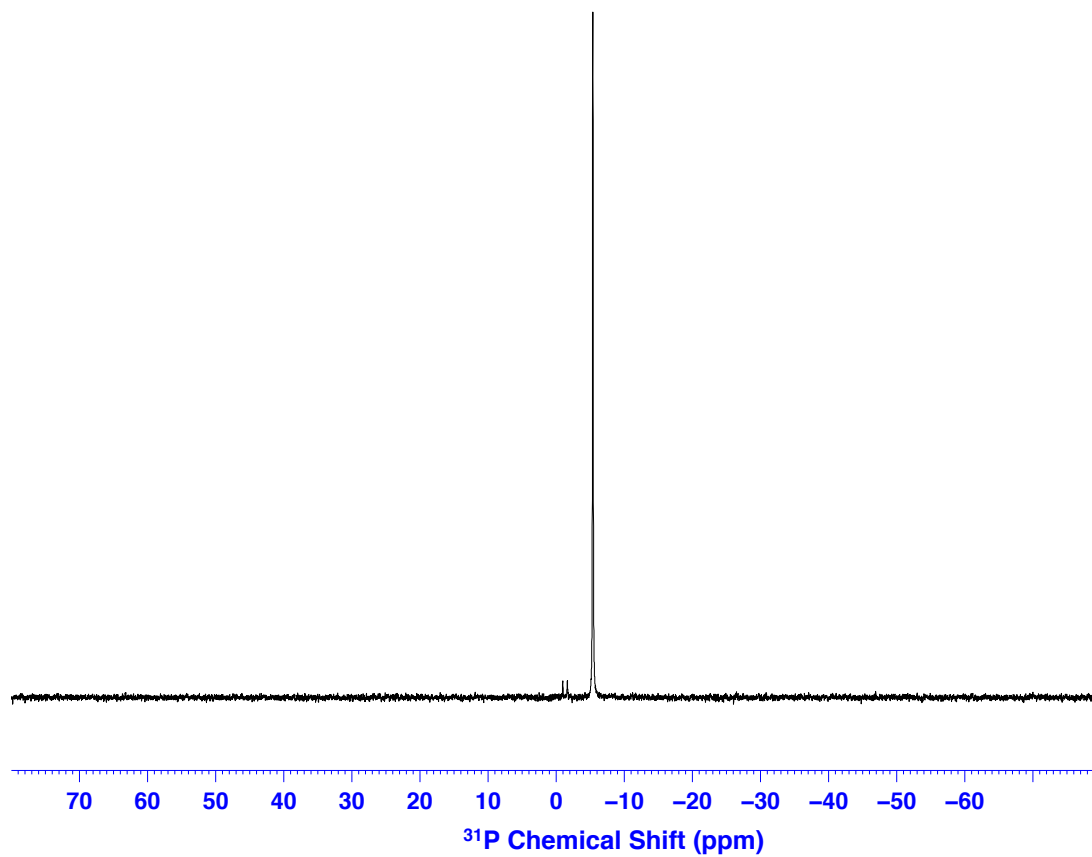

**Figure S6.**  $^{31}\text{P}$  NMR spectrum of potassium 1- $^{13}\text{C}$ -phosphoenolpyruvate- $\text{d}_2$  in  $\text{D}_2\text{O}$ .

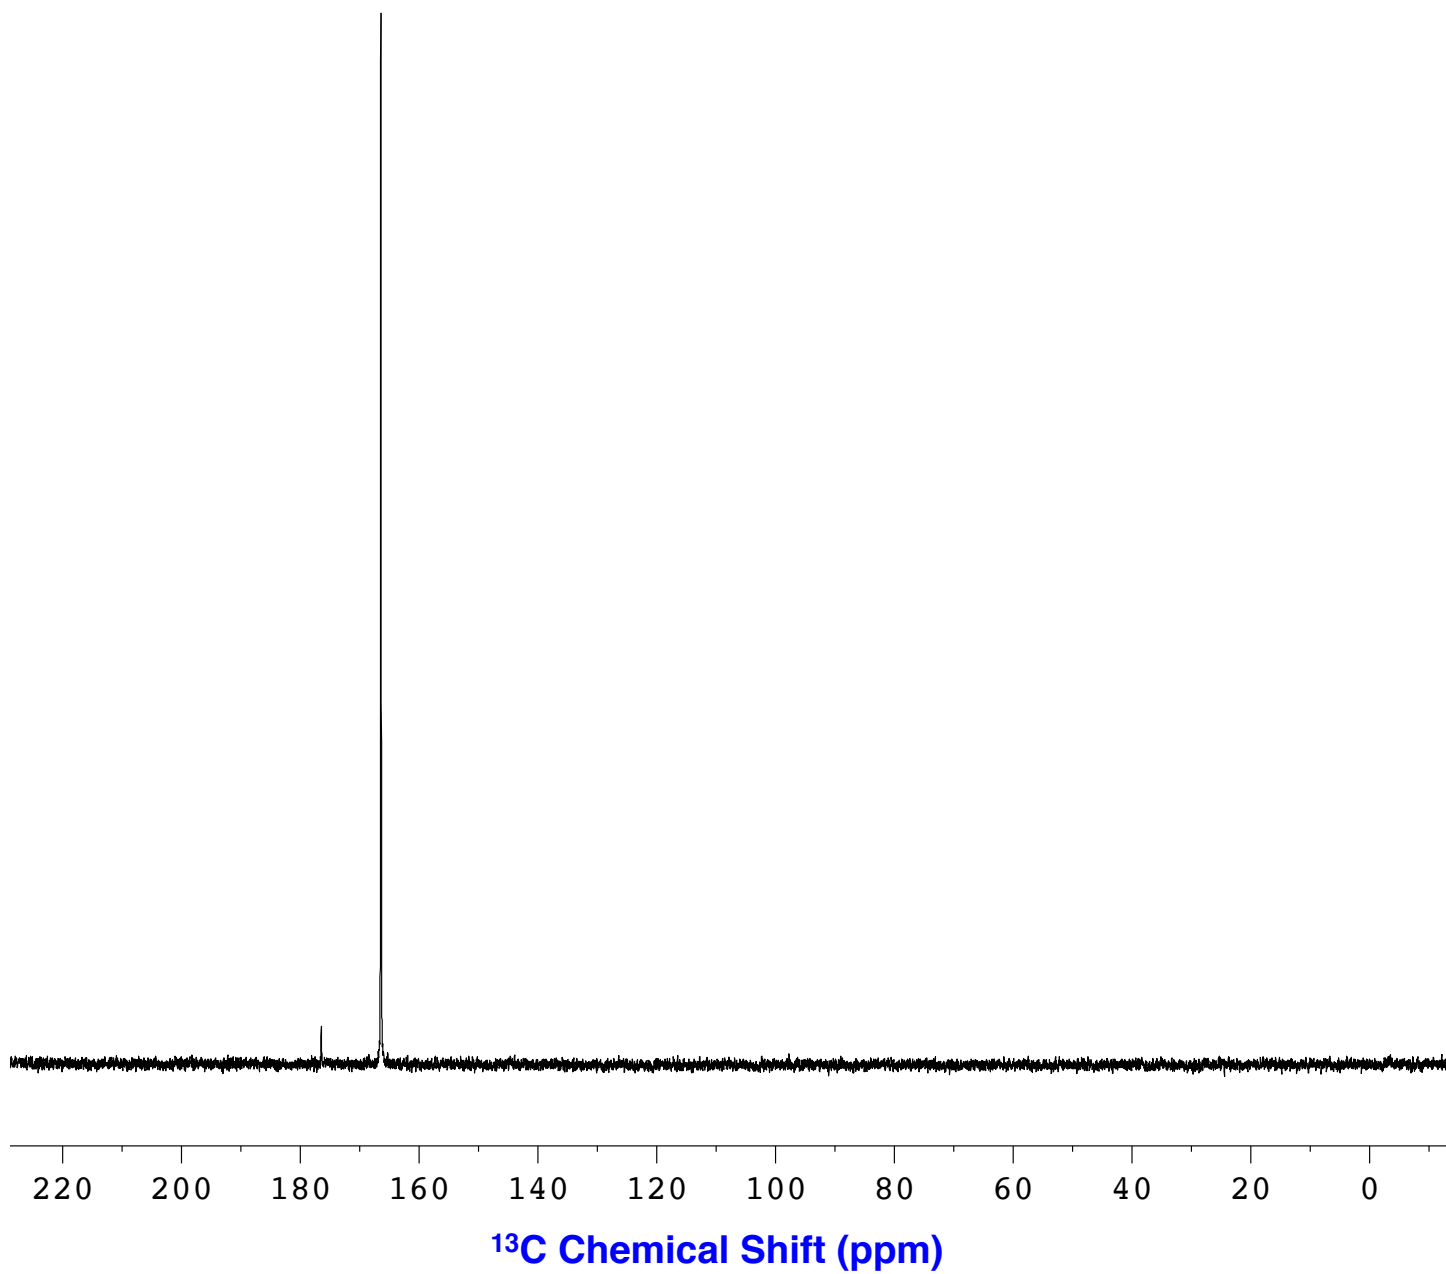

**Figure S7.**  $^{13}\text{C}$  NMR spectrum of potassium 1- $^{13}\text{C}$ -phosphoenolpyruvate- $\text{d}_2$  in  $\text{D}_2\text{O}$ .



### 3. Additional data

**Table S1. Signal enhancements and  $^1\text{H}$  polarizations obtained in PASADENA and ALTADENA experiments with phosphoenolpyruvate and phosphoenolpyruvate- $\text{d}_2$  after 5 s of  $\text{p-H}_2$  bubbling.**

| HP molecule                  | Protocol | p- $\text{H}_2$ fraction, % | $\epsilon_{1\text{H}}$ | $P_{1\text{H}}$ , % |                        |
|------------------------------|----------|-----------------------------|------------------------|---------------------|------------------------|
|                              |          |                             |                        | experimental        | at 85% p- $\text{H}_2$ |
| Phospholactate               | PASADENA | 85                          | 240                    | 0.71                | 0.71                   |
|                              | ALTADENA | 66                          | 17                     | 0.05                | 0.07                   |
| Phospholactate- $\text{d}_2$ | PASADENA | 69                          | 640                    | 1.86                | 2.53                   |
|                              | ALTADENA | 70                          | 220                    | 0.64                | 0.87                   |

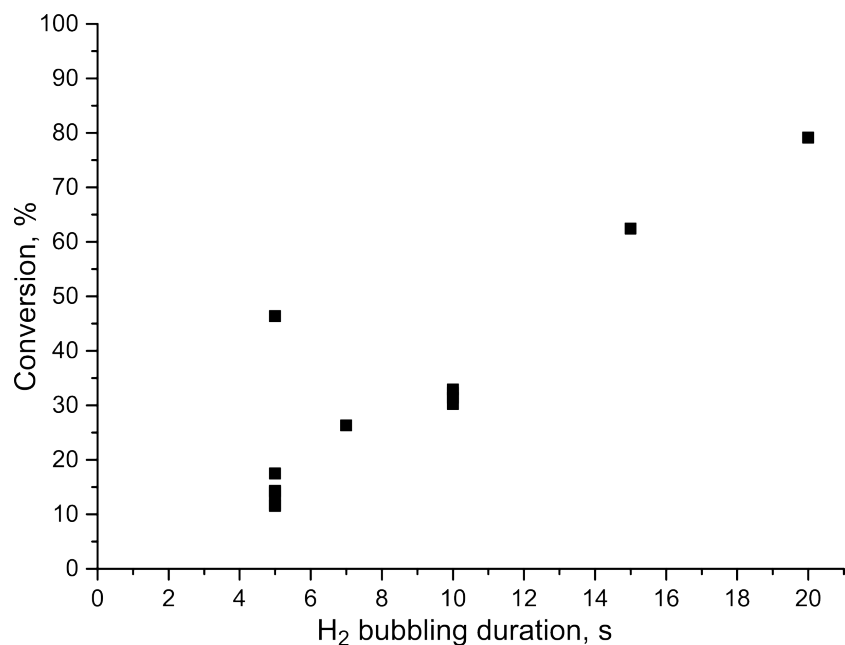

**Figure S8.** Plot of phosphoenolpyruvate conversion to phospholactate vs. duration of  $\text{H}_2$  bubbling.

**Table S2.** Signal enhancements and  $^{13}\text{C}$  polarizations obtained in MFC experiments with phosphoenolpyruvate and phosphoenolpyruvate- $\text{d}_2$  after 5 s of  $\text{p-H}_2$  bubbling.

| HP molecule                  | Magnetic field, $\mu\text{T}$ | $\text{p-H}_2$ fraction, % | $\epsilon_{^{13}\text{C}}$ | $P_{^{13}\text{C}}$ , % |                       |
|------------------------------|-------------------------------|----------------------------|----------------------------|-------------------------|-----------------------|
|                              |                               |                            |                            | experimental            | at 85% $\text{p-H}_2$ |
| Phospholactate               | 0                             | 71                         | 2.4                        | 0.002                   | 0.002                 |
|                              | 0.025                         | 72                         | 37                         | 0.027                   | 0.034                 |
|                              | 0.05                          | 72                         | 85                         | 0.062                   | 0.078                 |
|                              | 0.075                         | 71                         | 56                         | 0.041                   | 0.053                 |
|                              | 0.1                           | 81                         | 31                         | 0.022                   | 0.024                 |
| Phospholactate- $\text{d}_2$ | 0                             | 70                         | 25                         | 0.018                   | 0.024                 |
|                              | 0.025                         | 69                         | 62                         | 0.045                   | 0.062                 |
|                              | 0.04                          | 68                         | 23                         | 0.016                   | 0.023                 |
|                              | 0.05                          | 69                         | 104                        | 0.076                   | 0.10                  |
|                              | 0.06                          | 68                         | 93                         | 0.067                   | 0.094                 |
|                              | 0.075                         | 69                         | 7.2                        | 0.005                   | 0.007                 |
|                              | 0.1                           | 69                         | 27                         | 0.020                   | 0.027                 |

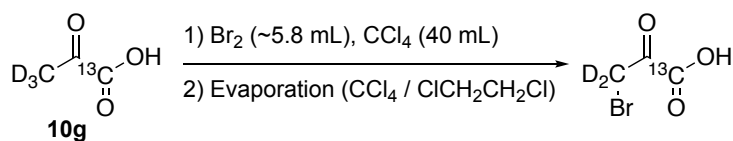

**Setup:**

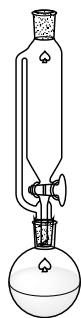

**Figure S9.** Experimental setup for the 1<sup>st</sup> step of 1- $^{13}\text{C}$ -phosphoenolpyruvate- $\text{d}_2$  synthesis. Reagents, solvents and other preparations employed in this step were as follows: 1) Pyruvic acid-1- $^{13}\text{C}$ - $\text{d}_2$  (MW= 91.08 g/mol,  $d = 1.25 \text{ g/mL}$ , 10.0g, 0.110 mol); 2) Bromine, 470864 ALDRICH,  $\geq 99.99\%$  trace metals basis (MW = 159.8 g/mol,  $d = 3.12 \text{ g/mL}$ , 0.110 mol, 5.6 mL). 3) Carbon tetrachloride, 289116 SIGMA-ALDRICH, anhydrous,  $\geq 99.5\%$  (~50mL). 4) 1,2-Dichloroethane, 284505 SIGMA-ALDRICH, anhydrous, 99.8% (~120 mL). 5) Ice bath should be prepared. 6) All glassware (250 mL round bottom flask, addition funnel, glass funnel and measuring cylinder) and magnetic stir bar were oven dried.

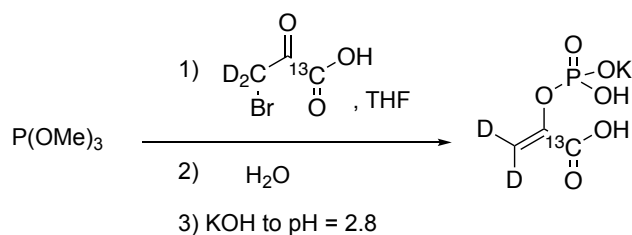

**Setup:**

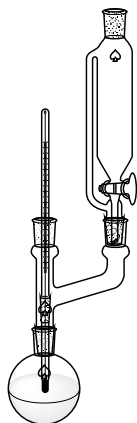

**Figure S10.** Experimental setup for the 2<sup>nd</sup> step of 1-<sup>13</sup>C-phosphoenolpyruvate-d<sub>2</sub> synthesis. Reagents, solvents and other preparations employed in this step were as follows: 1) Trimethyl phosphite, 240907 Aldrich, ≥99% (MW= 124.08 g/mol, d = 1.05 g/mL, 1.1eq., 14.3mL, 0.110 mol). 2) Tetrahydrofuran anhydrous, contains 250 ppm BHT as inhibitor, ≥99.9%, 186562 Sigma-Aldrich, (~50mL). #) Ice bath should be prepared (for day #2). 4) All glassware (250 ml round bottom flask, addition funnel, glass funnel and measuring cylinder) and magnetic stir bar were oven dried.
